# Supplementary material
Source: HighWire-hosted journal article supplement (https://www.jpn.ca/highwire/filestream/89356/field_highwire_adjunct_files/0/jpn-180226-1-at.pdf)
Supplement: jpn-180226-1-at.pdf [file jpn-180226-1-at.pdf]

**Appendix 1** to Moreira P, Macoveanu J, Marques P, et al. Altered response to risky decisions and reward in patients with obsessive-compulsive disorder. *J Psychiatry Neurosci* 2019.

DOI: 10.1503/jpn.180226

Copyright © 2019 The Author(s) or their employer(s). To receive this resource in an accessible format, please contact us at [cmajgroup@cmaj.ca](mailto:cmajgroup@cmaj.ca).

*Online appendices are unedited and posted as supplied by the authors.*

**Table S1.** Association between significant brain findings and clinical measures

| Risk Level | Scale  | Decision Period      |                      |                      |                      |                      |                      |                      |                      |                      | Loss                 |                      |                      |                      |                      |
|------------|--------|----------------------|----------------------|----------------------|----------------------|----------------------|----------------------|----------------------|----------------------|----------------------|----------------------|----------------------|----------------------|----------------------|----------------------|
|            |        | Nacc_C               | Ins_C                | Cing_C               | Prec_C               | Lingual_G            | Cing_G               | ACC_G                | Amyg_I               | ACC_I                | Cer_C                | Prec_C               | FSup_C               | Putamen_I            | ACC_I                |
| High       | HAS    | r=-0.072, BF10=0.254 | r=-0.166, BF10=0.331 | r=-0.309, BF10=0.768 | r=-0.332, BF10=0.928 | r=-0.043, BF10=0.244 | r=-0.013, BF10=0.239 | r=-0.017, BF10=0.24  | r=-0.042, BF10=0.244 | r=-0.055, BF10=0.248 | r=-0.163, BF10=0.327 | r=-0.107, BF10=0.274 | r=-0.066, BF10=0.251 | r=-0.328, BF10=0.902 | r=0.006, BF10=0.239  |
|            | HDS    | r=0.009, BF10=0.239  | r=-0.07, BF10=0.253  | r=0.419*, BF10=2.252 | r=0.057, BF10=0.248  | r=-0.077, BF10=0.256 | r=-0.234, BF10=0.462 | r=0.119, BF10=0.283  | r=-0.123, BF10=0.286 | r=0.193, BF10=0.371  | r=-0.133, BF10=0.294 | r=-0.251, BF10=0.509 | r=0.126, BF10=0.288  | r=-0.247, BF10=0.499 | r=0.15, BF10=0.311   |
|            | Y-BOCS | r=0.082, BF10=0.239  | r=0.063, BF10=0.229  | r=0.307, BF10=0.924  | r=0.116, BF10=0.264  | r=0.477*, BF10=9.37  | r=-0.081, BF10=0.238 | r=0.096, BF10=0.248  | r=0.175, BF10=0.341  | r=0.143, BF10=0.293  | r=0.193, BF10=0.378  | r=0.226, BF10=0.466  | r=0.136, BF10=0.284  | r=0.02, BF10=0.218   | r=0.039, BF10=0.222  |
|            | Onset  | r=-0.102, BF10=0.252 | r=-0.125, BF10=0.273 | r=-0.011, BF10=0.217 | r=0.067, BF10=0.231  | r=0.113, BF10=0.261  | r=-0.108, BF10=0.257 | r=-0.072, BF10=0.234 | r=0.302, BF10=0.874  | r=-0.096, BF10=0.248 | r=-0.228, BF10=0.472 | r=0.011, BF10=0.217  | r=-0.049, BF10=0.224 | r=-0.171, BF10=0.334 | r=-0.048, BF10=0.224 |
| Mid        | HAS    | r=0.108, BF10=0.274  | r=0.024, BF10=0.241  | r=0.192, BF10=0.37   | r=0.393*, BF10=1.684 | r=-0.094, BF10=0.265 | r=0.202, BF10=0.388  | r=0.266, BF10=0.561  | r=-0.111, BF10=0.276 | r=0.054, BF10=0.247  | r=-0.049, BF10=0.246 | r=-0.032, BF10=0.242 | r=0.038, BF10=0.243  | r=0.001, BF10=0.239  | r=0.281, BF10=0.622  |
|            | HDS    | r=0.105, BF10=0.272  | r=0.207, BF10=0.399  | r=0.365, BF10=1.263  | r=0.127, BF10=0.289  | r=-0.053, BF10=0.247 | r=0.13, BF10=0.291   | r=0.308, BF10=0.761  | r=0.002, BF10=0.239  | r=0.071, BF10=0.253  | r=-0.142, BF10=0.303 | r=-0.059, BF10=0.249 | r=0.275, BF10=0.599  | r=0.116, BF10=0.28   | r=0.262, BF10=0.548  |
|            | Y-BOCS | r=0.151, BF10=0.303  | r=0.238, BF10=0.506  | r=0.282, BF10=0.729  | r=0.091, BF10=0.244  | r=0.306, BF10=0.913  | r=0.011, BF10=0.217  | r=0.307, BF10=0.925  | r=0.277, BF10=0.697  | r=0.096, BF10=0.248  | r=0.001, BF10=0.217  | r=0.018, BF10=0.218  | r=0.217, BF10=0.439  | r=0.215, BF10=0.431  | r=0.113, BF10=0.261  |
|            | Onset  | r=0.195, BF10=0.383  | r=0.064, BF10=0.23   | r=0.032, BF10=0.22   | r=0.158, BF10=0.314  | r=0.06, BF10=0.228   | r=0.012, BF10=0.217  | r=0.222, BF10=0.452  | r=0.365*, BF10=1.746 | r=0.164, BF10=0.322  | r=-0.115, BF10=0.263 | r=0.037, BF10=0.221  | r=-0.006, BF10=0.217 | r=0.3, BF10=0.857    | r=0.139, BF10=0.288  |
| Low        | HAS    | r=0.075, BF10=0.255  | r=0.067, BF10=0.252  | r=0.26, BF10=0.54    | r=0.276, BF10=0.6    | r=-0.142, BF10=0.303 | r=0.137, BF10=0.298  | r=-0.033, BF10=0.242 | r=-0.08, BF10=0.257  | r=-0.167, BF10=0.332 | r=0.042, BF10=0.244  | r=0.111, BF10=0.276  | r=0.129, BF10=0.29   | r=-0.114, BF10=0.279 | r=0.02, BF10=0.24    |
|            | HDS    | r=0.111, BF10=0.276  | r=0.246, BF10=0.493  | r=0.362, BF10=1.23   | r=0.109, BF10=0.275  | r=-0.095, BF10=0.266 | r=0.13, BF10=0.292   | r=0.134, BF10=0.295  | r=-0.011, BF10=0.239 | r=0.007, BF10=0.239  | r=0.235, BF10=0.463  | r=0.092, BF10=0.264  | r=0.234, BF10=0.46   | r=0.018, BF10=0.24   | r=0.196, BF10=0.377  |
|            | Y-BOCS | r=0.075, BF10=0.235  | r=0.187, BF10=0.364  | r=0.164, BF10=0.323  | r=0.13, BF10=0.278   | r=0.248, BF10=0.549  | r=0.079, BF10=0.237  | r=0.103, BF10=0.253  | r=0.233, BF10=0.49   | r=0.083, BF10=0.239  | r=0.333, BF10=1.203  | r=0.087, BF10=0.242  | r=0.09, BF10=0.244   | r=0.356*, BF10=1.566 | r=0.287, BF10=0.763  |
|            | Onset  | r=0.035, BF10=0.22   | r=0.063, BF10=0.23   | r=0.205, BF10=0.405  | r=0.081, BF10=0.239  | r=0.005, BF10=0.217  | r=-0.05, BF10=0.225  | r=0.198, BF10=0.388  | r=0.103, BF10=0.253  | r=-0.068, BF10=0.232 | r=-0.313, BF10=0.973 | r=-0.159, BF10=0.314 | r=-0.274, BF10=0.678 | r=-0.167, BF10=0.327 | r=0.085, BF10=0.241  |

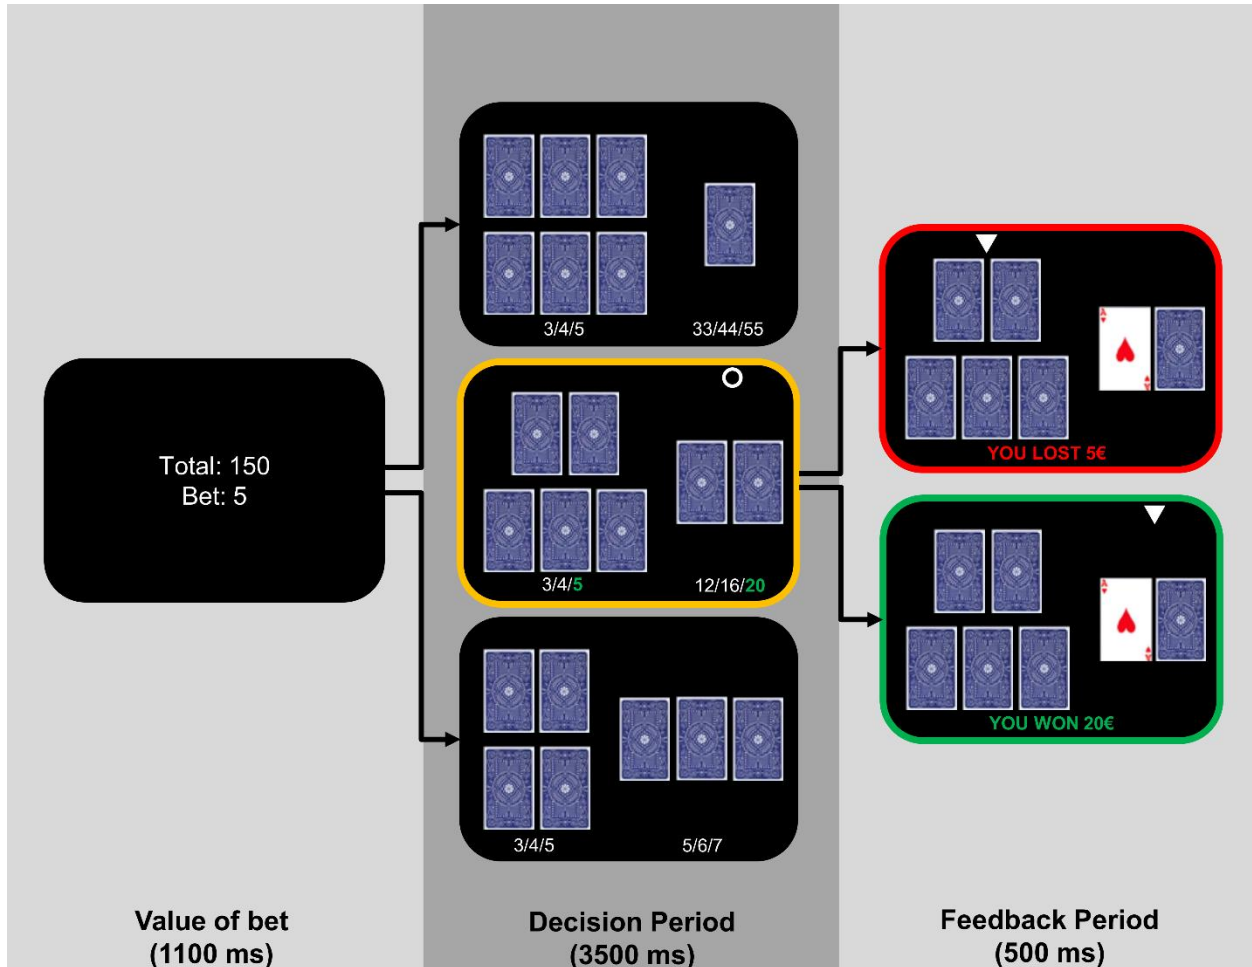

**Figure S1.** The gambling task. At the beginning of each trial (Information phase), participants were informed about the amount of accumulated money and the value of the current bet; next (Decision phase), two decks were displayed facedown; finally (Outcome phase), the location of the ace of arts was displayed and the subjects received the feedback indicating that they either won or lost the bet.
